# Supplementary material for: Reduction of nitroaromatics to arylnitrenium ions by vinyl halide cationsElectronic Supplementary Information (ESI) available: supplementary spectra and B3LYP/6-31G(d) optimized geometry and energy of molecules and ions. See http://www.rsc.org/suppdata/cc/b3/b314713d/
Source: Royal Society of Chemistry journal article supplement (doi:10.1039/b314713d), 2004-01-01
Supplement: b314713d.doc [file b314713d.doc]

Reduction of Nitroaromatics into Arylnitrenium Ions

by Vinyl Halide Cation

Hao Chen, Xubin Zheng, Pengxiang Yang and R. G. Cooks*

Department of Chemistry,`

560 Oval Drive, Purdue University, West Lafayette, IN 47907, USA

# Supporting Information

**Figure 1S** Chemical ionization mass spectrum of a mixture of nitrobenzene and nitrobenzene-d5 (ca. 1:1 by volume) using 1,2-dichloroethane as the reagent gas. The phenylnitreium ion (m/z 92) and its benzene-ring-deuterated ion (m/z 97) are produced as well as the vinylated nitrobenzene ion [PhNO2 + C2H3]+ (m/z 150) and its benzene-ring-deuterated isotopomeric ion (m/z 155).

**Fig 2S** CID product ion MS/MS spectra of: a) [PhNO2 + C2H3]+ (m/z 150), b) [PhNO2-d5 + C2H3]+ (m/z 155) and c) [PhNO2 + C2D3]+ (m/z 153) using argon as target at nominally 10 eV collision energy.

**Figure 3S** Energy diagram for the nitro reduction reaction between nitrobenzene and CH2=CH-Cl+. . There might be energy barriers for the conversions of the ion 4 into 5 and of the ion 5 into 6.

**Figure 4S** Product ion mass spectrum showing ion/molecule reaction of nitrobenzene with CH2=CH-79Br+. (m/z 106) at nominally zero kinetic energy; the phenylnitrenium ion PhNH+ (m/z 92) is the main product ion.

**Figure 5S** a) Product ion mass spectrum showing ion/molecule reactions of the phenylnitrenium ion PhNH+ (m/z 92) with ethyl vinyl ether. The protonated indole ion (m/z 118) is produced as the main product. Note that the protonation occurs at C3 atom to form the stable indolenium ion. b) CID product ion MS/MS spectrum of the product ion at m/z 118 generated from the ionization of a mixture of nitrobenzene, vinyl bromide and ethyl vinyl ether and c) CID product ion MS/MS spectrum of protonated indole (m/z 118) generated by CI of authentic indole using isobutane as the reagent gas. Spectra b and c are identical.

**Table 1S B3LYP/6-31G(d) Calculated Energies for Molecules and Cations**

| Species | E (Hartreesa) | ZPEb | Corrected Energiesc | E (kcal/mol) |
| --- | --- | --- | --- | --- |
| PhNO2 (1) | -436.750585 | 0.103586 | -436.65114 | -d |
| CH2=CH-Cl+. (2a) | -537.8311515 | 0.042114 | -537.7907221 | - |
| CH2=CH-Br+.(2b) | -2649.3472336 | 0.041575 | -2649.307321 | - |
| Cl. (3a) | -460.1362422 | 0.000000 | -460.1362422 | - |
| Br. (3b) | -2571.6569182 | 0.000000 | -2571.6569182 | - |
| PhN+(O)OCH=CH2 (4) | -514.4730012 | 0.147803 | -514.33111 | - |
| PhN+OCH2CH=O (5) | -514.5096219 | 0.147992 | -514.36755 | - |
| PhNH+ (6) | -286.6702715 | 0.105611 | -286.56888 | - |
| CO (7) | -113.3094543 | 0.005032 | -113.30462 | - |
| HCHO (8) | -114.5004725 | 0.026840 | -114.47471 | - |
| C2H3+ (9) | -77.5860437 | 0.035076 | -77.55237 | - |
| 4 – 5 | - | - | - | + 22.9 |
| (6 +7+ 8+3a) – (1 + 2a) | - | - | - | -26.7 |
| (6 +7+ 8+3b) – (1 + 2b) | - | - | - | -29.3 |
| (6 +7+ 8) – (1 + 9) | - | - | - | -90.8 |

a1Hartree=627.51 kcal/mol; bUncorrected; cCalculated as E + ZPE  0.96; dNot Applied.

**Table 2S** Reductive Chemical Ionization of Substituted Nitrobenzenes

| Compounds | Reagent gases | m/z of the generated arylnitrenium ions  (m/z of its CID fragment ions) | m/z of the generated vinylated ions  (m/z of its CID fragment ions) |
| --- | --- | --- | --- |
| nitrobenzene | 1,2-dichloroethane | 92(39,65) | 150(92) |
|  | 1,2-dichloroethane-d4 | 93(39,65) | 153(93) |
|  | vinyl bromide | 92(39,65) | 150(92) |
| 4-nitrotoluene | 1,2-dichloroethane | 106(39,51,65,79) | 164(106) |
| 4-bromo-1-nitrobenzene | 1,2-dichloroethane | 170a(91,143a) | 228a(170a) |
| 1,3-dinitrobenzene | 1,2-dichloroethane | 137(52,54,79,91) | 195(137) |
| 2,4-dinitrotoluene | 1,2-dichloroethane | 151(93,104,105) | 209(151) |
| 2,4,6-trinitrotoluene (TNT) | 1,2-dichloroethane | 196(66,80,91,92,121,138,150) | 254(196) |

aContaining 79Br.
